# Supplementary material for: Ethno-racial inequalities on adverse birth and neonatal outcomes: a nationwide, retrospective cohort study of 21 million Brazilian newborns
Source: PubMed Central journal article supplement — Lancet Reg Health Am. 2024 Jul 5;37:100833. doi: 10.1016/j.lana.2024.100833 (PMC11269955; doi:10.1016/j.lana.2024.100833), 2024-07-05

**Table 1. Maternal characteristics according to maternal race/skin colour (N=21,261,936), including children of mothers of Asian descent.**

|                                            | Maternal ethnic-racial group |                 |                   |                              |                  |                   |
|--------------------------------------------|------------------------------|-----------------|-------------------|------------------------------|------------------|-------------------|
|                                            | Indigenous<br>n (%)          | Black<br>n (%)  | Parda<br>n (%)    | Asian<br>descendent<br>n (%) | White<br>n (%)   | Total<br>n (%)    |
| <b>Children, by maternal skin color</b>    | 173,810 (0.8)                | 1,205,157 (5.7) | 11,906,994 (56.0) | 88,671 (0.4)                 | 7,887,304 (37.1) | 21,261,936 (100)  |
| <b>Maternal characteristic at delivery</b> |                              |                 |                   |                              |                  |                   |
| Schooling, years                           |                              |                 |                   |                              |                  |                   |
| 0                                          | 19,938 (11.5)                | 7683 (0.6)      | 71,510 (0.6)      | 327 (0.4)                    | 10,689 (0.1)     | 110,147 (0.5)     |
| 1 to 3                                     | 19,303 (11.1)                | 42,350 (3.5)    | 402,274 (3.4)     | 1,515 (1.7)                  | 94,276 (1.2)     | 559,718 (2.6)     |
| 4 to 7                                     | 52,925 (30.5)                | 261,045 (21.7)  | 2,612,265 (21.9)  | 10,769 (12.1)                | 887,659 (11.3)   | 3,824,663 (18.0)  |
| ≥ 8                                        | 74,643 (43.0)                | 881,423 (73.1)  | 8,652,536 (72.7)  | 74,939 (84.5)                | 6,838,915 (86.7) | 16,522,456 (77.7) |
| Missing                                    | 7,001 (4.0)                  | 12,656 (1.1)    | 168,409 (1.4)     | 1,121 (1.3)                  | 55,765 (0.7)     | 244,952 (1.2)     |
| Marital status                             |                              |                 |                   |                              |                  |                   |
| Married/Cohabiting                         | 32,264 (53.1)                | 551,062 (45.7)  | 6,287,178 (52.0)  | 54,090 (61.0)                | 4,877,340 (61.8) | 11,861,934 (55.8) |
| Widow/Separated                            | 928 (0.5)                    | 14,699 (1.2)    | 124,325 (1.0)     | 1,858 (2.1)                  | 140,596 (1.8)    | 282,406 (1.3)     |
| Single                                     | 77,447 (44.6)                | 631,330 (0.7)   | 5,409,964 (45.4)  | 32,168 (36.3)                | 2,835,474 (35.9) | 8,986,383 (42.3)  |
| Missing                                    | 3,171 (1.8)                  | 8,066 (0.7)     | 85,527 (0.7)      | 555 (0.6)                    | 33,894 (0.4)     | 131,213 (0.6)     |
| Age                                        |                              |                 |                   |                              |                  |                   |
| < 20 years                                 | 50,791 (29.2)                | 200,301 (16.6)  | 2,470,035 (20.7)  | 11,485 (12.9)                | 995,186 (12.6)   | 3,727,798 (17.5)  |
| 20-34 years                                | 105,245 (60.6)               | 839,715 (69.7)  | 8,119,485 (68.2)  | 60,608 (68.4)                | 5,564,210 (70.5) | 14,689,263 (69.1) |
| 35-49 years                                | 17,356 (10.0)                | 164,938 (13.7)  | 1,315,774 (11.0)  | 16,550 (18.7)                | 1,326,645 (16.8) | 2,841,263 (13.4)  |
| ≥ 50 years                                 | 375 (0.2)                    | 137 (0.0)       | 1,161 (0.0)       | 21 (0.0)                     | 851 (0.0)        | 2,545 (0.0)       |
| Missing                                    | 43 (0.0)                     | 66 (0.0)        | 539 (0.0)         | 7 (0.0)                      | 412 (0.0)        | 1,067 (0.0)       |
| Parity                                     |                              |                 |                   |                              |                  |                   |
| 0                                          | 45,191 (26.0)                | 461,682 (38.3)  | 4,486,795 (37.7)  | 40,508 (45.7)                | 3,720,977 (47.2) | 8,755,153 (41.2)  |
| 1                                          | 38,248 (22.0)                | 354,868 (29.5)  | 3,631,954 (30.5)  | 29,018 (32.7)                | 2,585,531 (32.8) | 6,639,619 (31.2)  |
| 2                                          | 27,091 (15.6)                | 182,734 (15.2)  | 1,774,163 (14.9)  | 10,519 (11.9)                | 921,574 (11.7)   | 2,916,081 (13.7)  |
| 3 or more                                  | 57,661 (33.2)                | 161,075 (13.4)  | 1,379,500 (11.6)  | 5,486 (6.2)                  | 461,350 (5.9)    | 2,065,072 (9.7)   |
| Missing                                    | 5,619 (3.2)                  | 44,798 (3.7)    | 634,582 (5.3)     | 3,140 (3.5)                  | 197,872 (2.5)    | 886,011 (4.2)     |
| Prenatal consultations, number             |                              |                 |                   |                              |                  |                   |

|                             |                |                  |                   |               |                  |                   |
|-----------------------------|----------------|------------------|-------------------|---------------|------------------|-------------------|
| 0                           | 9,015 (5.2)    | 25,675 (2.1)     | 219,137 (1.8)     | 1,069 (1.2)   | 76,142 (1.0)     | 331,038 (1.6)     |
| 1 to 3                      | 35,155 (20.2)  | 93,945 (7.8)     | 919,071 (7.7)     | 4,558 (5.1)   | 268,273 (3.4)    | 1,321,002 (6.2)   |
| 4 or more                   | 128,345 (73.8) | 1,076,646 (89.3) | 10,702,057 (89.9) | 82,662 (93.2) | 7,506,203 (95.2) | 19,495,913 (91.7) |
| Missing                     | 1,295 (0.8)    | 8,891 (0.7)      | 66,729 (0.6)      | 382 (0.4)     | 36,686 (0.5)     | 113,983 (0.5)     |
| <b>Type of delivery</b>     |                |                  |                   |               |                  |                   |
| Vaginal                     | 138,819 (79.9) | 617,837 (51.3)   | 5,972,707 (50.2)  | 37,970 (42.8) | 2,642,783 (33.5) | 9,410,116 (44.3)  |
| Cesarian                    | 34,825 (20.0)  | 586,509 (48.7)   | 5,925,532 (49.8)  | 50,642 (57.1) | 5,241,061 (66.5) | 11,838,569 (55.7) |
| Missing                     | 166 (0.1)      | 811 (0.1)        | 8,755 (0.1)       | 59 (0.1)      | 3,460 (0.0)      | 13,251 (0.1)      |
| <b>Pregnancy outcomes</b>   |                |                  |                   |               |                  |                   |
| <b>Gestational age</b>      |                |                  |                   |               |                  |                   |
| 22-36 weeks                 | 25,951 (14.9)  | 133,364 (11.1)   | 1,266,627 (10.6)  | 9,062 (10.2)  | 790,255 (10.0)   | 2,225,259 (10.5)  |
| 37-41 weeks                 | 138,500 (79.7) | 1,035,412 (85.9) | 10,189,759 (85.6) | 77,491 (87.4) | 6,939,887 (88.0) | 18,381,049 (86.4) |
| ≥ 42 weeks                  | 9,359 (5.4)    | 36,381 (3.0)     | 450,608 (3.8)     | 2,118 (2.4)   | 157,162 (2.0)    | 655,628 (3.1)     |
| Missing                     |                |                  |                   |               |                  |                   |
| <b>Birthweight</b>          |                |                  |                   |               |                  |                   |
| <2500g                      | 12,712 (7.3)   | 104,017 (5.6)    | 865,265 (7.3)     | 6,693 (7.5)   | 569,119 (7.2)    | 1,557,806 (7.3)   |
| ≥2500g                      | 161,098 (92.7) | 1,101,140 (91.4) | 11,041,729 (92.7) | 81,978 (92.4) | 7,318,185 (92.8) | 19,704,130 (92.7) |
| Missing                     |                |                  |                   |               |                  |                   |
| <b>Birthweight, centile</b> |                |                  |                   |               |                  |                   |
| < 3rd                       | 8,649 (5.0)    | 40,103 (3.3)     | 364,700 (3.1)     | 2,214 (2.5)   | 175,481 (2.2)    | 591,147 (2.8)     |
| ≥ 3rd a < 10th              | 11,072 (6.4)   | 72,630 (6.0)     | 643,253 (5.4)     | 4,443 (5.0)   | 360,371 (4.6)    | 1,091,769 (5.1)   |
| ≥ 10th a < 90th             | 116,293 (66.9) | 886,710 (73.6)   | 8,708,227 (73.1)  | 68,062 (76.8) | 5,981,894 (75.8) | 15,761,186 (74.1) |
| ≥ 90th                      | 34,769 (20.0)  | 203,978 (16.9)   | 2,176,539 (18.3)  | 13,886 (15.8) | 1,363,090 (17.3) | 3,792,262 (17.8)  |
| Missing                     | 3,027 (1.7)    | 1,736 (0.1)      | 14,275 (0.1)      | 66 (0.1)      | 6,468 (0.1)      | 25,572 (0.1)      |
| <b>Early neonatal death</b> |                |                  |                   |               |                  |                   |
| No                          | 172,494 (99.2) | 1,198,360 (99.4) | 11,844,597 (99.5) | 88,356 (99.6) | 7,854,799 (99.6) | 21,158,606 (99.5) |
| Yes                         | 1,316 (0.8)    | 6,797 (0.6)      | 62,397 (0.5)      | 315 (0.4)     | 32,505 (0.4)     | 103,330 (0.5)     |

Figure S1: Preterm birth, LBW, SGA and early neonatal mortality rates by maternal race/skin colour group, including children of mothers of Asian descent.

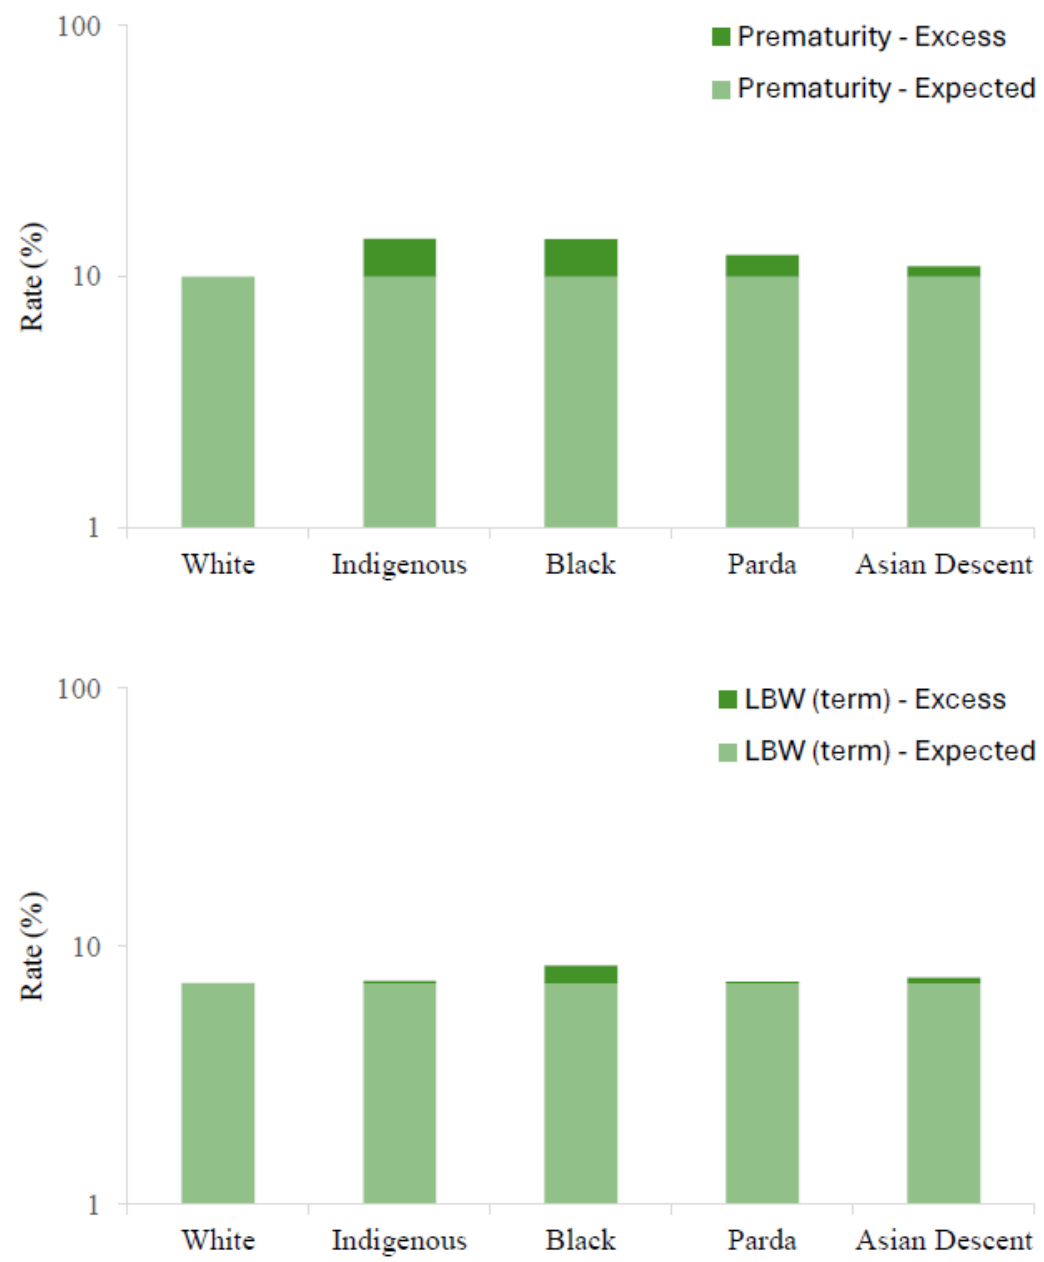

**Table 2. Preterm birth, LBW (term), SGA and early neonatal death (children of mothers of Asian descent related to White).**

|                             | <b>Asian decendent</b>    |                           |                           |
|-----------------------------|---------------------------|---------------------------|---------------------------|
|                             | No adjustment             |                           | Adjustment <sup>1,2</sup> |
| <b>Preterm birth</b>        | 2.0%<br>(0.0-3.8)         | 1.8%<br>(0.1-3.7)         | 0.7%<br>(-0.1-2.7)        |
| <b>LBW (term)</b>           | 8.2%<br>(4.9-11.4)        | 8%<br>(4.7-11.3)          | 6.9%<br>(3.5-10.2)        |
| <b>SGA birth</b>            | 9.5%<br>(7.3-11.6)        | 8.9%<br>(6.8-11.0)        | 6.9%<br>(4.7-9.1)         |
| <b>Early neonatal death</b> | -16.0%<br>(-29.6 to -3.8) | -16.7%<br>(-30.5 to -4.4) | -18.7%<br>(-31.9 to -6.0) |

Data are % (95% CI)

<sup>1</sup>Mother's schooling. Compared with white women.

<sup>2</sup>Age of mother, parity, delivery

**Table 3. Preterm birth, LBW term, SGA and early neonatal death attributable to maternal race/skin colour inequality in Brasil in 2012-19 (data for Figure 3)**

|                               | Number of women in the group | Number of women with the outcome | Outcome rate | Number of women with the outcome if the rate were proportionally equal to that of the reference group | Excess outcome | Attributable fraction |
|-------------------------------|------------------------------|----------------------------------|--------------|-------------------------------------------------------------------------------------------------------|----------------|-----------------------|
| <b>Preterm birth</b>          |                              |                                  |              |                                                                                                       |                |                       |
| Maternal race/skin colour     |                              |                                  |              |                                                                                                       |                |                       |
| White                         | 7887304                      | 790255                           | 10,0         | 790255                                                                                                | Ref            |                       |
| Asian descent                 | 88671                        | 9062                             | 10,2         | 8867                                                                                                  | 195            | 2,2                   |
| Indigenous people             | 173810                       | 25951                            | 14,9         | 17381                                                                                                 | 8570           | 33,0                  |
| Black                         | 1205157                      | 133364                           | 11,1         | 120516                                                                                                | 12848          | 9,6                   |
| Parda                         | 11906994                     | 1266627                          | 10,6         | 1190699                                                                                               | 75928          | 6,0                   |
| <i>Total</i>                  |                              |                                  |              |                                                                                                       | 97541          |                       |
| <b>Low birthweight (term)</b> |                              |                                  |              |                                                                                                       |                |                       |
| Maternal race/skin colour     |                              |                                  |              |                                                                                                       |                |                       |
| White                         | 7887304                      | 569119                           | 7,2          | 569119                                                                                                | Ref            |                       |
| Asian descent                 | 88671                        | 6693                             | 7,5          | 6384                                                                                                  | 309            | 4,6                   |
| Indigenous people             | 173810                       | 12712                            | 7,3          | 12514                                                                                                 | 198            | 1,6                   |
| Black                         | 1205157                      | 104017                           | 8,6          | 86771                                                                                                 | 17246          | 16,6                  |
| Parda                         | 11906994                     | 865265                           | 7,3          | 857304                                                                                                | 7961           | 0,9                   |
| <i>Total</i>                  |                              |                                  |              |                                                                                                       | 25713          |                       |
| <b>SGA</b>                    |                              |                                  |              |                                                                                                       |                |                       |
| Maternal race/skin colour     |                              |                                  |              |                                                                                                       |                |                       |
| White                         | 7887304                      | 535852                           | 6,8          | 535852                                                                                                | Ref            |                       |
| Asian descent                 | 88671                        | 6657                             | 7,5          | 6030                                                                                                  | 627            | 9,4                   |
| Indigenous people             | 173810                       | 19721                            | 11,3         | 11819                                                                                                 | 7902           | 40,1                  |
| Black                         | 1205157                      | 112733                           | 9,4          | 81951                                                                                                 | 30782          | 27,3                  |
| Parda                         | 11906994                     | 1007953                          | 8,5          | 809676                                                                                                | 198277         | 19,7                  |
| <i>Total</i>                  |                              |                                  |              |                                                                                                       | 237589         |                       |
| <b>Early neonatal death</b>   |                              |                                  |              |                                                                                                       |                |                       |
| Maternal race/skin colour     |                              |                                  |              |                                                                                                       |                |                       |
| White                         | 7887304                      | 32505                            | 0,4          | 32505                                                                                                 | Ref            |                       |
| Asian descent                 | 88671                        | 315                              | 0,4          | 355                                                                                                   | -40            | -12,6                 |
| Indigenous people             | 173810                       | 1316                             | 0,8          | 695                                                                                                   | 621            | 47,2                  |
| Black                         | 1205157                      | 6797                             | 0,6          | 4821                                                                                                  | 1976           | 29,1                  |
| Parda                         | 11906994                     | 62397                            | 0,5          | 47628                                                                                                 | 14769          | 23,7                  |
| <i>Total</i>                  |                              |                                  |              |                                                                                                       | 17326          |                       |

**Table 4. Attributable fractions of preterm birth, LBW, SGA and early neonatal mortality by mother's schooling and maternal race/skin colour group, including children of mothers of Asian descent.**

|                             |        | <b>Maternal race/skin colour groups</b> |                     |                     |                     |                          |
|-----------------------------|--------|-----------------------------------------|---------------------|---------------------|---------------------|--------------------------|
|                             |        | White                                   | Indigenous          | Black               | Parda               | Asian descent            |
| <b>Preterm birth</b>        |        |                                         |                     |                     |                     |                          |
| Mother Schooling            |        |                                         |                     |                     |                     |                          |
|                             | ≥8     | Ref                                     | 21.0<br>(19.5-22.5) | 5.8<br>(5.2-6.5)    | 1.4<br>(1.1-1.7)    | -0.4<br>(-2.7 to -1.8)   |
|                             | 4 to 7 | 11.0<br>(10.4-11.6)                     | 31.7<br>(30.3-33.1) | 15.0<br>(14.0-15.9) | 14.0<br>(13.6-14.4) | 1.7<br>(13.0-21.6)       |
|                             | 1 to 3 | 15.0<br>(13.5-16.5)                     | 34.0<br>(31.7-36.1) | 21.0<br>(19.0-23.0) | 18.4<br>(17.6-19.2) | 10.7<br>(-2.7-22.4)      |
|                             | 0      | 22.1<br>(18.3-25.8)                     | 27.8<br>(25.1-30.3) | 22.8<br>(18.3-27.0) | 18.2<br>(16.5-19.8) | 8.1<br>(-24.4-32.1)      |
| <b>LBW (term)</b>           |        |                                         |                     |                     |                     |                          |
| Mother Schooling            |        |                                         |                     |                     |                     |                          |
|                             | ≥8     | Ref                                     | 16.2<br>(12.7-19.6) | 22.3<br>(21.3-23.2) | 10.7<br>(10.2-11.3) | 7.1<br>(3.1-11.0)        |
|                             | 4 to 7 | 26.3<br>(25.3-27.2)                     | 31.9<br>(28.8-35.0) | 39.5<br>(38.2-40.7) | 29.8<br>(29.2-30.5) | 26.1<br>(18.2-33.3)      |
|                             | 1 to 3 | 36.5<br>(34.4-38.6)                     | 39.8<br>(35.3-43.9) | 47.5<br>(45.1-49.8) | 37.7<br>(35.9-38.2) | 39.5<br>(22.8-52.6)      |
|                             | 0      | 43.3<br>(38.1-48.1)                     | 64.1<br>(62.0-66.0) | 53.0<br>(48.4-57.3) | 46.4<br>(44.4-48.4) | 25.3<br>(-32.9-58.0)     |
| <b>SGA</b>                  |        |                                         |                     |                     |                     |                          |
| Mother Schooling            |        |                                         |                     |                     |                     |                          |
|                             | ≥8     | Ref                                     | 21.1<br>(19.2-23.0) | 24.5<br>(23.9-25.0) | 16.4<br>(16.1-16.7) | 7.0<br>(4.5-9.4)         |
|                             | 4 to 7 | 26.1<br>(25.5-26.7)                     | 33.9<br>(32.2-35.6) | 38.1<br>(37.3-38.9) | 33.0<br>(32.7-33.4) | 29.9<br>(25.6-33.9)      |
|                             | 1 to 3 | 35.0<br>(33.6-36.3)                     | 40.3<br>(37.8-42.7) | 45.4<br>(43.9-46.9) | 38.5<br>(37.8-39.2) | 41.8<br>(32.1-49.2)      |
|                             | 0      | 41.0<br>(37.6-44.2)                     | 60.5<br>(59.2-61.8) | 50.9<br>(47.9-53.6) | 46.2<br>(45.0-47.3) | 31.2<br>(3.2-51.1)       |
| <b>Early neonatal death</b> |        |                                         |                     |                     |                     |                          |
| Mother Schooling            |        |                                         |                     |                     |                     |                          |
|                             | ≥8     | Ref                                     | 19.0<br>(10.8-26.5) | 21.5<br>(18.9-24.0) | 16.9<br>(15.5-18.2) | -17.7<br>(-33.2 to -3.9) |
|                             | 4 to 7 | 16.5<br>(13.8-19.4)                     | 14.9<br>(4.7-24.0)  | 24.9<br>(20.7-28.8) | 26.6<br>(24.7-28.4) | 0.4<br>(-32.1 to 25.0)   |
|                             | 1 to 3 | 27.8<br>(21.4-33.7)                     | 30.0<br>(17.2-40.9) | 32.5<br>(24.0-40.0) | 31.7<br>(28.4-34.9) | -37.9<br>(-231.1-42.5)   |
|                             | 0      | 45.8<br>(33.3-55.9)                     | 61.5<br>(56.3-66.1) | 49.2<br>(36.3-59.5) | 41.1<br>(35.5-46.3) | -                        |

Data are % (95% CI)

Values adjusted to age of mother, parity and delivery

**Figure S2. Attributable fractions of preterm birth, LBW, SGA and early neonatal death by maternal race/skin colour including children of mothers of Asian descent, by year (2012-2019).**

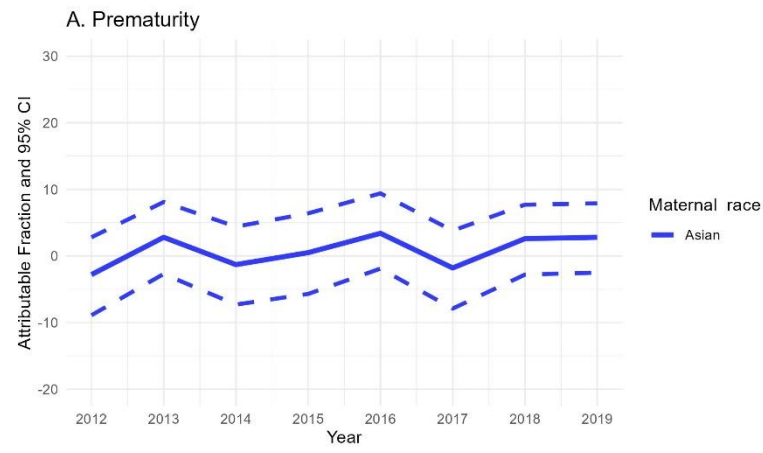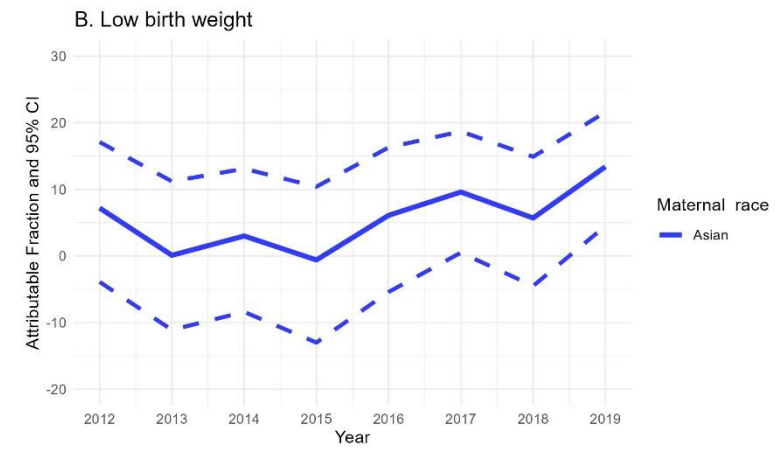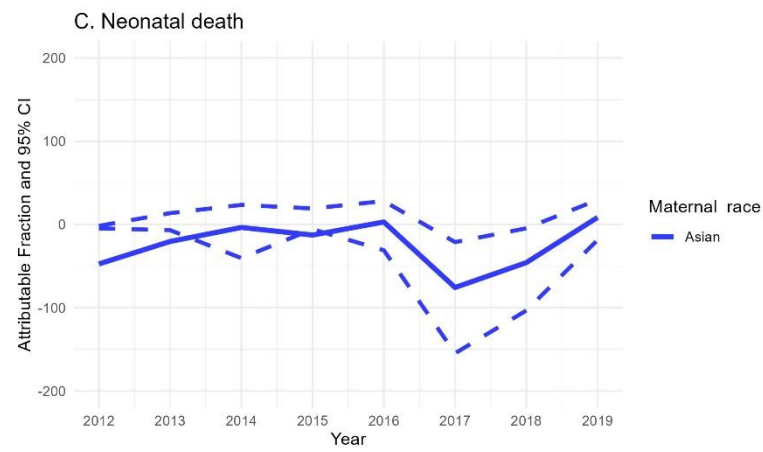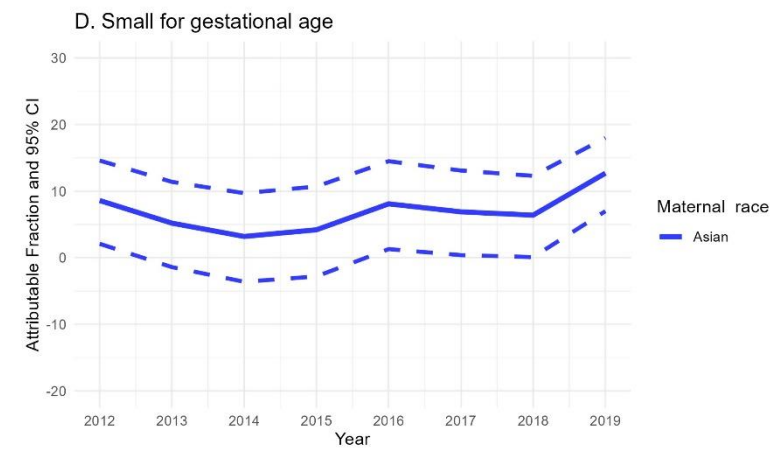

Supplement: mmc1.pdf [file mmc1.pdf]
